# Supplementary material
Source: publisher figshare collection journal article supplement (https://osapublishing.figshare.com/ndownloader/files/8775034)
Supplement: Supplementary file 1 [file 8775034]

Angular Error Number of Sensors: 3										Mean	WST Rank		Angular Error Number of Sensors: 5										Mean	WST Rank
Algorithm	Sensor Configuration	Image											Algorithm	Sensor Configuration	Image
		I1	I2	I3	I4	I5	I6	I7	I8						I1	I2	I3	I4	I5	I6	I7	I8
Gray World	S1	0.0737	0.2861	0.2115	0.3851	0.2339	0.0416	0.0401	0.1775	0.1812	2		Gray World	S1	0.1299	0.3747	0.2564	0.4555	0.2708	0.0505	0.0519	0.2059	0.2244	1
	S2	0.2282	0.5083	0.3665	0.6215	0.2953	0.0621	0.0571	0.2245	0.2954	0			S2	0.1881	0.4887	0.3585	0.5778	0.3211	0.0555	0.0612	0.2546	0.2882	0
	S3	0.0768	0.2969	0.2211	0.4021	0.241	0.043	0.041	0.1829	0.1881	1			S3	0.084	0.2875	0.2058	0.3788	0.2324	0.043	0.0434	0.1777	0.1816	2
Max-RGB	S1	0.1267	0.2402	0.1835	0.0534	0.037	0.075	0.0411	0.1258	0.1103	5		Max-RGB	S1	0.1343	0.3054	0.1671	0.0146	0.0457	0.0983	0.0141	0.1204	0.1125	4
	S2	0.1788	0.3404	0.2346	0.1155	0.0477	0.1585	0.0622	0.1553	0.1616	0			S2	0.1706	0.3709	0.1943	0.126	0.0597	0.1083	0.0471	0.1601	0.1546	1
	S3	0.1314	0.2495	0.1918	0.0532	0.038	0.0847	0.0434	0.1286	0.1151	4			S3	0.1178	0.2757	0.1333	0.0155	0.0399	0.0827	0.0109	0.1088	0.0981	7
Shades of Gray	S1	0.1422	0.1725	0.2246	0.024	0.127	0.0662	0.0474	0.1446	0.1186	3		Shades of Gray	S1	0.1636	0.2455	0.2504	0.0377	0.1336	0.0771	0.0555	0.1629	0.1408	2
	S2	0.173	0.263	0.2577	0.0899	0.1421	0.0988	0.0519	0.1819	0.1573	1			S2	0.1821	0.2972	0.2702	0.0966	0.147	0.0838	0.0564	0.1965	0.1662	1
	S3	0.1465	0.1756	0.2306	0.0263	0.1305	0.0686	0.049	0.1488	0.122	2			S3	0.1407	0.1866	0.2195	0.025	0.1158	0.0665	0.0461	0.1422	0.1178	3
Gray Edge	S1	0.1126	0.1548	0.2218	0.0154	0.0492	0.0499	0.0501	0.1207	0.0968	7		Gray Edge	S1	0.1331	0.2209	0.2653	0.0258	0.0518	0.0613	0.0586	0.1376	0.1193	4
	S2	0.1394	0.2728	0.2791	0.0655	0.0451	0.0801	0.0615	0.1493	0.1366	1			S2	0.1416	0.2935	0.2817	0.0614	0.0598	0.0689	0.0594	0.1642	0.1413	2
	S3	0.1162	0.1592	0.2309	0.0168	0.0506	0.052	0.052	0.1242	0.1002	6			S3	0.1125	0.1705	0.2233	0.0178	0.0449	0.0511	0.0464	0.1205	0.0984	8
Angular Error Number of Sensors: 8										Mean	WST Rank		Angular Error Number of Sensors: 12										Mean	WST Rank
Algorithm	Sensor Configuration	Image											Algorithm	Sensor Configuration	Image
		I1	I2	I3	I4	I5	I6	I7	I8						I1	I2	I3	I4	I5	I6	I7	I8
Gray World	S1	0.2033	0.4814	0.3047	0.4992	0.299	0.0562	0.0579	0.2213	0.2654	1		Gray World	S1	0.2507	0.5482	0.3355	0.5197	0.3202	0.0591	0.0607	0.2297	0.2905	1
	S2	0.2645	0.5871	0.3647	0.5131	0.3122	0.0576	0.0616	0.2447	0.3007	0			S2	0.3149	0.6531	0.3905	0.5352	0.3645	0.0615	0.0631	0.238	0.3276	0
	S3	0.0847	0.2857	0.2046	0.3767	0.2309	0.043	0.0434	0.1767	0.1807	2			S3	0.0848	0.2852	0.2042	0.3761	0.2305	0.0429	0.0434	0.1763	0.1804	2
Max-RGB	S1	0.1442	0.3371	0.1961	0.0268	0.051	0.1174	0.0244	0.1327	0.1287	4		Max-RGB	S1	0.1541	0.3528	0.2067	0.0442	0.0513	0.1267	0.0362	0.137	0.1386	4
	S2	0.1924	0.3867	0.2274	0.1277	0.0444	0.1214	0.0545	0.1444	0.1624	2			S2	0.1602	0.3813	0.2205	0.1079	0.0529	0.1384	0.046	0.1414	0.1561	2
	S3	0.1108	0.2514	0.1403	0.0177	0.0401	0.0823	0.011	0.0996	0.0942	8			S3	0.11	0.2515	0.1582	0.0164	0.04	0.0821	0.0112	0.1033	0.0966	8
Shades of Gray	S1	0.18	0.3095	0.2557	0.046	0.143	0.0827	0.0601	0.1738	0.1564	2		Shades of Gray	S1	0.1934	0.3624	0.2585	0.0515	0.1499	0.0852	0.0629	0.1794	0.1679	3
	S2	0.2057	0.3955	0.2427	0.05	0.1472	0.0799	0.0563	0.1862	0.1704	1			S2	0.2196	0.4471	0.2594	0.0566	0.1648	0.0884	0.0653	0.1797	0.1851	2
	S3	0.1396	0.1832	0.2184	0.0251	0.1151	0.0661	0.0459	0.1405	0.1167	4			S3	0.1393	0.183	0.2193	0.0251	0.1149	0.066	0.0459	0.1406	0.1168	4
Gray Edge	S1	0.1456	0.265	0.2779	0.0313	0.0552	0.0671	0.0652	0.146	0.1317	2		Gray Edge	S1	0.1543	0.3089	0.2835	0.0361	0.0574	0.07	0.0695	0.1514	0.1414	3
	S2	0.1569	0.3368	0.2711	0.0372	0.0463	0.0653	0.0585	0.1541	0.1408	2			S2	0.1646	0.3728	0.2829	0.0468	0.0585	0.0757	0.074	0.1485	0.153	2
	S3	0.1116	0.1663	0.2227	0.0178	0.0447	0.0507	0.0461	0.1197	0.0975	8			S3	0.1114	0.1658	0.2226	0.0178	0.0446	0.0506	0.046	0.1195	0.0973	8
Angular Error Number of Sensors: 20										Mean	WST Rank		xy Chromaticity Error											Mean	WST Rank
Algorithm	Sensor Configuration	Image											No. of Sensors	Algorithm	Sensor Configuration	Image
		I1	I2	I3	I4	I5	I6	I7	I8							I1	I2	I3	I4	I5	I6	I7	I8
Gray World	S1	0.2894	0.5987	0.3597	0.531	0.3393	0.0616	0.0633	0.2361	0.3099	1		3	Gray World	S1	0.0217	0.1112	0.086	0.1819	0.0827	0.014	0.0098	0.0462	0.0692	2
	S2	0.3365	0.6497	0.3825	0.544	0.3619	0.0658	0.0669	0.2402	0.3309	0				S2	0.0532	0.1176	0.0918	0.1683	0.077	0.0151	0.0136	0.0453	0.0727	0
	S3	0.0849	0.2849	0.204	0.3757	0.2303	0.0429	0.0434	0.1762	0.1803	2				S3	0.0239	0.1141	0.0875	0.1822	0.0832	0.014	0.0098	0.0466	0.0702	1
Max-RGB	S1	0.1531	0.3727	0.2158	0.0712	0.0528	0.1101	0.0374	0.1427	0.1445	4			Max-RGB	S1	0.0372	0.0543	0.038	0.0103	0.0092	0.0183	0.0214	0.0301	0.0274	7
	S2	0.1682	0.3741	0.2143	0.0858	0.0513	0.112	0.0504	0.146	0.1503	3				S2	0.0389	0.0834	0.0335	0.0165	0.0069	0.0356	0.0145	0.0284	0.0322	2
	S3	0.1098	0.2518	0.1604	0.0171	0.04	0.0822	0.0112	0.1032	0.097	8				S3	0.0375	0.0562	0.038	0.0099	0.0091	0.0244	0.0208	0.0302	0.0283	3
Shades of Gray	S1	0.2037	0.4003	0.261	0.0554	0.1567	0.087	0.0667	0.1835	0.1768	3			Shades of Gray	S1	0.051	0.0594	0.0509	0.0115	0.0282	0.0231	0.0092	0.0408	0.0343	3
	S2	0.2199	0.4445	0.2648	0.0605	0.1648	0.0908	0.0761	0.1869	0.1885	2				S2	0.0443	0.0682	0.049	0.0205	0.0258	0.0231	0.0088	0.0361	0.0345	4
	S3	0.1392	0.1829	0.219	0.0251	0.1148	0.0659	0.0458	0.1404	0.1166	4				S3	0.0509	0.0605	0.0508	0.012	0.0283	0.023	0.0092	0.0409	0.0345	3
Gray Edge	S1	0.1632	0.3374	0.2837	0.0405	0.0596	0.0723	0.0751	0.1558	0.1485	4			Gray Edge	S1	0.0457	0.0476	0.0456	0.0079	0.0142	0.0186	0.0106	0.0361	0.0283	14
	S2	0.1839	0.374	0.2819	0.0463	0.0649	0.0776	0.0898	0.1617	0.16	2				S2	0.0347	0.0672	0.0412	0.0158	0.0067	0.0193	0.0134	0.0298	0.0285	15
	S3	0.1113	0.1658	0.2225	0.0178	0.0446	0.0506	0.0459	0.1194	0.0972	9				S3	0.0449	0.0487	0.0457	0.008	0.0141	0.0185	0.0108	0.036	0.0283	13
													5	Gray World	S1	0.0202	0.1407	0.0908	0.1775	0.0851	0.0138	0.0121	0.0419	0.0728	1
															S2	0.0411	0.1479	0.1076	0.1829	0.0934	0.0144	0.0134	0.0425	0.0804	0
															S3	0.0202	0.1474	0.0913	0.178	0.0861	0.0137	0.0118	0.0418	0.0738	1
														Max-RGB	S1	0.0347	0.0585	0.0324	0.0035	0.0095	0.0268	0.0013	0.019	0.0232	29
															S2	0.0426	0.0789	0.0299	0.0363	0.0113	0.0308	0.0116	0.0139	0.0319	5
															S3	0.0372	0.0609	0.0302	0.0082	0.0098	0.0238	0.0027	0.0201	0.0241	28
														Shades of Gray	S1	0.0535	0.0727	0.0513	0.012	0.0226	0.0233	0.0103	0.0376	0.0354	2
															S2	0.0511	0.0751	0.0518	0.0279	0.0219	0.0219	0.0105	0.0299	0.0363	3
															S3	0.0537	0.0756	0.0494	0.0104	0.0217	0.0232	0.0083	0.0384	0.0351	2
														Gray Edge	S1	0.0478	0.0574	0.0566	0.0091	0.0125	0.0198	0.0124	0.0348	0.0313	3
															S2	0.041	0.066	0.0481	0.0194	0.0101	0.0186	0.0129	0.0252	0.0302	6
															S3	0.0485	0.0586	0.0582	0.008	0.0126	0.0193	0.0097	0.0355	0.0313	4
													8	Gray World	S1	0.0319	0.1154	0.0867	0.1721	0.0766	0.0158	0.0132	0.0424	0.0693	6
															S2	0.0378	0.1205	0.0903	0.1713	0.076	0.0163	0.013	0.0442	0.0712	1
															S3	0.0359	0.1116	0.0878	0.1709	0.0748	0.0161	0.0132	0.0439	0.0693	6
														Max-RGB	S1	0.0325	0.0454	0.0367	0.003	0.0101	0.0332	0.0031	0.019	0.0229	25
															S2	0.0443	0.0458	0.0405	0.0134	0.0074	0.0363	0.0101	0.0186	0.027	5
															S3	0.0442	0.0705	0.0343	0.0328	0.014	0.0381	0.0192	0.0115	0.0331	2
														Shades of Gray	S1	0.0464	0.054	0.0429	0.0126	0.0225	0.0235	0.0105	0.0343	0.0308	4
															S2	0.0476	0.0605	0.0425	0.0088	0.0213	0.0233	0.0104	0.0346	0.0311	4
															S3	0.0426	0.0171	0.0281	0.0144	0.0213	0.0228	0.0074	0.0333	0.0234	19
														Gray Edge	S1	0.04	0.0427	0.0486	0.0092	0.0117	0.0195	0.0117	0.0303	0.0267	19
															S2	0.0407	0.0479	0.0452	0.0069	0.0091	0.02	0.0101	0.0301	0.0262	25
															S3	0.0376	0.0175	0.0493	0.0104	0.0111	0.0176	0.0046	0.0293	0.0222	30
													12	Gray World	S1	0.0388	0.121	0.0908	0.1734	0.0778	0.0161	0.0133	0.0434	0.0718	1
															S2	0.0431	0.1309	0.0956	0.1765	0.0823	0.0171	0.014	0.0431	0.0753	0
															S3	0.0396	0.1206	0.0914	0.1736	0.077	0.0162	0.0133	0.0438	0.0719	1
														Max-RGB	S1	0.0286	0.0475	0.0377	0.0031	0.0098	0.0374	0.0028	0.0175	0.0231	20
															S2	0.0299	0.0491	0.0376	0.0084	0.0107	0.0392	0.0033	0.0178	0.0245	15
															S3	0.5037	0.1949	0.1576	0.0422	0.0551	0.0257	0.1166	0.0699	0.1457	0
														Shades of Gray	S1	0.0454	0.0572	0.045	0.0137	0.0224	0.0231	0.0103	0.0335	0.0313	4
															S2	0.0455	0.0611	0.0445	0.0149	0.0237	0.0237	0.0112	0.0325	0.0321	4
															S3	0.0527	0.0486	0.0274	0.0187	0.0226	0.023	0.0077	0.0333	0.0293	4
														Gray Edge	S1	0.0375	0.046	0.0496	0.0105	0.0113	0.0187	0.011	0.0293	0.0267	21
															S2	0.0362	0.0487	0.0474	0.011	0.0121	0.0197	0.012	0.028	0.0269	23
															S3	0.04	0.1053	0.0486	0.0112	0.0111	0.0178	0.0062	0.029	0.0337	14
													20	Gray World	S1	0.0387	0.1196	0.0904	0.173078525	0.0789	0.0162	0.0134	0.0434	0.0717	1
															S2	0.0356	0.1134	0.0859	0.171529425	0.0812	0.0169	0.0133	0.0453	0.0704	1
															S3	0.039	0.1209	0.091	0.173489302	0.0779	0.0162	0.0133	0.0436	0.0719	1
														Max-RGB	S1	0.0302	0.0518	0.0386	0.001784264	0.0097	0.0319	0.0026	0.0172	0.023	28
															S2	0.0304	0.0482	0.0394	0.006441527	0.0078	0.0275	0.0005	0.0146	0.0219	39
															S3	0.3152	0.4806	0.2532	0.00746231	0.0766	0.0127	0.0404	0.3735	0.195	0
														Shades of Gray	S1	0.0455	0.0583	0.046	0.013540604	0.0227	0.0232	0.0106	0.0333	0.0316	4
															S2	0.046	0.0617	0.0504	0.010591987	0.0229	0.0239	0.0108	0.0352	0.0327	4
															S3	0.0532	0.2616	0.3218	0.008883773	0.0211	0.0231	0.0073	0.0341	0.0914	0
														Gray Edge	S1	0.0382	0.0499	0.0488	0.010580878	0.0114	0.0189	0.0115	0.0292	0.0273	22
															S2	0.0407	0.0577	0.0508	0.009740803	0.0113	0.0183	0.0108	0.0316	0.0289	20
															S3	0.0415	0.7672	0.2422	0.007127792	0.0114	0.0176	0.0105	0.03	0.1409	0
